# Supplementary material
Source: Springer Nature journal article supplement (https://www.springermedizin.de/resource/supplementary/13019_2009_235_MOESM1_ESM.pdf/9638234)

a

13/01/2009  
15:03:28  
0:01 6:41

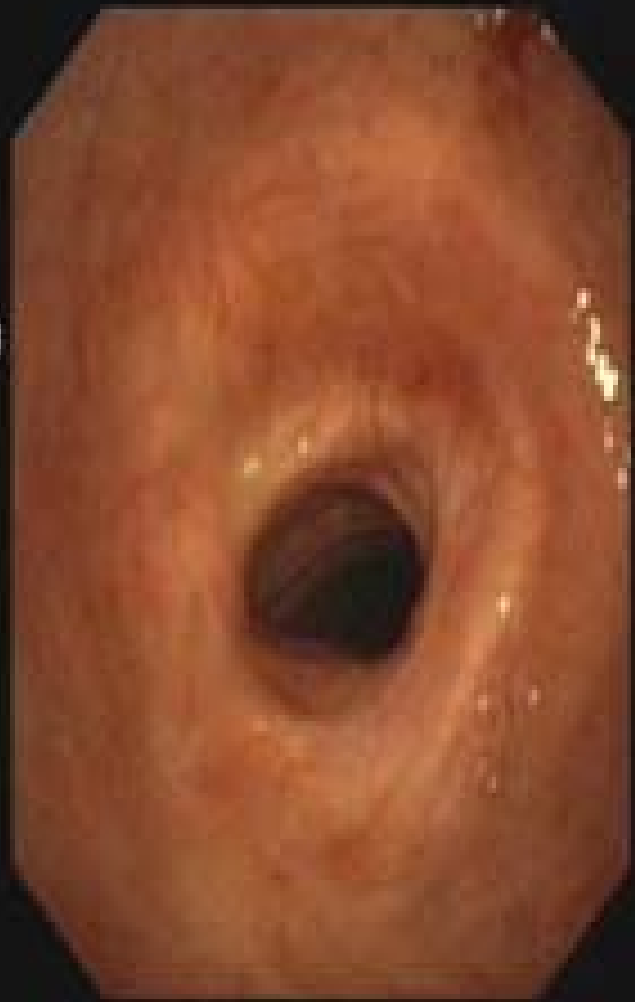

Physician's  
Comment:

b

13/01/2009  
15:03:32  
0:01 6:41

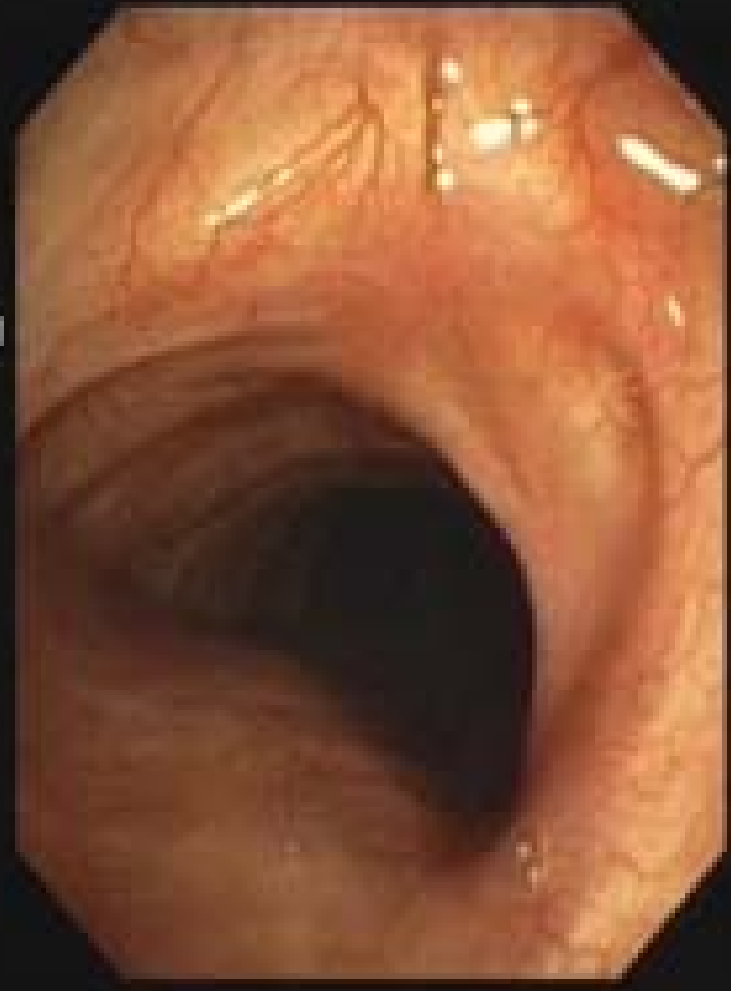

Physician's  
Comment:

Supplement: MOESM1 [file 9638234]
